# Supplementary material for: Becquerelite mineral phase: crystal structure and thermodynamic and mechanical stability by using periodic DFT
Source: Royal Society of Chemistry journal article supplement (doi:10.1039/c8ra04678f), 2018-01-01
Supplement: c8ra04678f1.pdf [file c8ra04678f1.pdf]

## SUPPLEMENTARY INFORMATION

# Becquerelite mineral phase: crystal structure and thermodynamic and mechanic stability by using periodic DFT

*Francisco Colmenero<sup>a</sup>, Ana María Fernández<sup>b</sup>, Vicente Timón<sup>a</sup> and Joaquin Cobos<sup>b</sup>*

<sup>a</sup>Instituto de Estructura de la Materia (CSIC). C/ Serrano, 113. 28006 – Madrid, Spain.

<sup>b</sup>Centro de Investigaciones Energéticas, Medioambientales y Tecnológicas (CIEMAT). Avda/  
Complutense, 40. 28040 – Madrid, Spain.

**Table S.1.** Calculated isobaric heat capacity function,  $C_p$ , of becquerelite. Temperature and heat capacity values are given in  $K$  and  $J \cdot K^{-1} \cdot mol^{-1}$  units, respectively.

| T   | $C_p$     | T   | $C_p$     | T    | $C_p$     |
|-----|-----------|-----|-----------|------|-----------|
| 10  | 1.59646   | 350 | 158.73070 | 690  | 193.50098 |
| 20  | 6.74505   | 360 | 160.46961 | 700  | 194.10347 |
| 30  | 13.95060  | 370 | 162.13674 | 710  | 194.69408 |
| 40  | 22.20754  | 380 | 163.73601 | 720  | 195.27332 |
| 50  | 30.92287  | 390 | 165.27110 | 730  | 195.84167 |
| 60  | 39.65372  | 400 | 166.74548 | 740  | 196.39958 |
| 70  | 48.11604  | 410 | 168.16244 | 750  | 196.94747 |
| 80  | 56.15642  | 420 | 169.52506 | 760  | 197.48575 |
| 90  | 63.70929  | 430 | 170.83629 | 770  | 198.01478 |
| 100 | 70.76223  | 440 | 172.09887 | 780  | 198.53490 |
| 110 | 77.33249  | 450 | 173.31543 | 790  | 199.04646 |
| 120 | 83.45203  | 460 | 174.48844 | 800  | 199.54974 |
| 130 | 89.15862  | 470 | 175.62023 | 810  | 200.04503 |
| 140 | 94.49062  | 480 | 176.71301 | 820  | 200.53261 |
| 150 | 99.48419  | 490 | 177.76886 | 830  | 201.01272 |
| 160 | 104.17209 | 500 | 178.78977 | 840  | 201.48559 |
| 170 | 108.58321 | 510 | 179.77759 | 850  | 201.95146 |
| 180 | 112.74272 | 520 | 180.73409 | 860  | 202.41051 |
| 190 | 116.67242 | 530 | 181.66093 | 870  | 202.86296 |
| 200 | 120.39118 | 540 | 182.55967 | 880  | 203.30897 |
| 210 | 123.91541 | 550 | 183.43181 | 890  | 203.74873 |
| 220 | 127.25944 | 560 | 184.27873 | 900  | 204.18238 |
| 230 | 130.43596 | 570 | 185.10177 | 910  | 204.61010 |
| 240 | 133.45622 | 580 | 185.90215 | 920  | 205.03201 |
| 250 | 136.33036 | 590 | 186.68104 | 930  | 205.44825 |
| 260 | 139.06756 | 600 | 187.43955 | 940  | 205.85896 |
| 270 | 141.67618 | 610 | 188.17872 | 950  | 206.26425 |
| 280 | 144.16391 | 620 | 188.89952 | 960  | 206.66424 |
| 290 | 146.53785 | 630 | 189.60286 | 970  | 207.05903 |
| 300 | 148.80458 | 640 | 190.28960 | 980  | 207.44873 |
| 310 | 150.97022 | 650 | 190.96055 | 990  | 207.83344 |
| 320 | 153.04047 | 660 | 191.61648 | 1000 | 208.21325 |
| 330 | 155.02068 | 670 | 192.25809 | -    | -         |
| 340 | 156.91586 | 680 | 192.88604 | -    | -         |

**Table S.2.** Calculated entropy function,  $S$ , of becquerelite. Temperature and entropy values are given in  $K$  and  $J \cdot K^{-1} \cdot mol^{-1}$  units, respectively.

| T   | S         | T   | S         | T    | S         |
|-----|-----------|-----|-----------|------|-----------|
| 10  | 0.67942   | 350 | 196.97227 | 690  | 317.31869 |
| 20  | 3.20211   | 360 | 201.46840 | 700  | 320.10725 |
| 30  | 7.25114   | 370 | 205.88796 | 710  | 322.86477 |
| 40  | 12.37826  | 380 | 210.23328 | 720  | 325.59187 |
| 50  | 18.26548  | 390 | 214.50637 | 730  | 328.28924 |
| 60  | 24.67746  | 400 | 218.70933 | 740  | 330.95761 |
| 70  | 31.43067  | 410 | 222.84424 | 750  | 333.59755 |
| 80  | 38.38558  | 420 | 226.91301 | 760  | 336.20974 |
| 90  | 45.44057  | 430 | 230.91754 | 770  | 338.79471 |
| 100 | 52.52259  | 440 | 234.85955 | 780  | 341.35314 |
| 110 | 59.57859  | 450 | 238.74080 | 790  | 343.88557 |
| 120 | 66.57320  | 460 | 242.56298 | 800  | 346.39249 |
| 130 | 73.48069  | 470 | 246.32773 | 810  | 348.87447 |
| 140 | 80.28556  | 480 | 250.03671 | 820  | 351.33206 |
| 150 | 86.97670  | 490 | 253.69127 | 830  | 353.76569 |
| 160 | 93.54856  | 500 | 257.29301 | 840  | 356.17588 |
| 170 | 99.99759  | 510 | 260.84336 | 850  | 358.56309 |
| 180 | 106.32304 | 520 | 264.34359 | 860  | 360.92782 |
| 190 | 112.52496 | 530 | 267.79511 | 870  | 363.27046 |
| 200 | 118.60479 | 540 | 271.19912 | 880  | 365.59150 |
| 210 | 124.56486 | 550 | 274.55697 | 890  | 367.89129 |
| 220 | 130.40723 | 560 | 277.86978 | 900  | 370.17026 |
| 230 | 136.13468 | 570 | 281.13871 | 910  | 372.42878 |
| 240 | 141.75035 | 580 | 284.36493 | 920  | 374.66731 |
| 250 | 147.25704 | 590 | 287.54952 | 930  | 376.88614 |
| 260 | 152.65788 | 600 | 290.69348 | 940  | 379.08564 |
| 270 | 157.95557 | 610 | 293.79783 | 950  | 381.26622 |
| 280 | 163.15339 | 620 | 296.86357 | 960  | 383.42818 |
| 290 | 168.25392 | 630 | 299.89166 | 970  | 385.57183 |
| 300 | 173.26031 | 640 | 302.88303 | 980  | 387.69754 |
| 310 | 178.17520 | 650 | 305.83852 | 990  | 389.80556 |
| 320 | 183.00126 | 660 | 308.75896 | 1000 | 391.89627 |
| 330 | 187.74108 | 670 | 311.64534 | -    | -         |
| 340 | 192.39731 | 680 | 314.49831 | -    | -         |

**Table S.3.** Calculated enthalpy function,  $\Delta H$  ( $\Delta H = H_T - H_{298}$ ), of becquerelite. Temperature and enthalpy values are given in  $K$  and  $J \cdot K^{-1} \cdot mol^{-1}$  units, respectively.

| T   | $H_T - H_{298}$ | T   | $H_T - H_{298}$ | T    | $H_T - H_{298}$ |
|-----|-----------------|-----|-----------------|------|-----------------|
| 10  | -2629.36792     | 350 | 22.77841        | 690  | 99.87522        |
| 20  | -1312.71807     | 360 | 26.57909        | 700  | 101.21705       |
| 30  | -871.73489      | 370 | 30.22050        | 710  | 102.52951       |
| 40  | -649.29751      | 380 | 33.71311        | 720  | 103.81361       |
| 50  | -514.12810      | 390 | 37.06691        | 730  | 105.07035       |
| 60  | -422.55649      | 400 | 40.29052        | 740  | 106.30078       |
| 70  | -355.91743      | 410 | 43.39217        | 750  | 107.50575       |
| 80  | -304.90595      | 420 | 46.37925        | 760  | 108.68620       |
| 90  | -264.36377      | 430 | 49.25843        | 770  | 109.84288       |
| 100 | -231.19955      | 440 | 52.03597        | 780  | 110.97661       |
| 110 | -203.44644      | 450 | 54.71768        | 790  | 112.08819       |
| 120 | -179.79019      | 460 | 57.30875        | 800  | 113.17832       |
| 130 | -159.31877      | 470 | 59.81402        | 810  | 114.24774       |
| 140 | -141.37785      | 480 | 62.23811        | 820  | 115.29700       |
| 150 | -125.48493      | 490 | 64.58516        | 830  | 116.32685       |
| 160 | -111.27635      | 500 | 66.85907        | 840  | 117.33782       |
| 170 | -98.47191       | 510 | 69.06351        | 850  | 118.33053       |
| 180 | -86.85232       | 520 | 71.20188        | 860  | 119.30558       |
| 190 | -76.24298       | 530 | 73.27731        | 870  | 120.26340       |
| 200 | -66.50322       | 540 | 75.29284        | 880  | 121.20456       |
| 210 | -57.51894       | 550 | 77.25109        | 890  | 122.12958       |
| 220 | -49.19518       | 560 | 79.15476        | 900  | 123.03887       |
| 230 | -41.45364       | 570 | 81.00631        | 910  | 123.93291       |
| 240 | -34.22809       | 580 | 82.80795        | 920  | 124.81214       |
| 250 | -27.46286       | 590 | 84.56200        | 930  | 125.67696       |
| 260 | -21.10995       | 600 | 86.27031        | 940  | 126.52779       |
| 270 | -15.12876       | 610 | 87.93488        | 950  | 127.36497       |
| 280 | -9.48392        | 620 | 89.55755        | 960  | 128.18891       |
| 290 | -4.14450        | 630 | 91.14000        | 970  | 129.00000       |
| 300 | 0.91641         | 640 | 92.68393        | 980  | 129.79851       |
| 310 | 5.72214         | 650 | 94.19068        | 990  | 130.58479       |
| 320 | 10.29372        | 660 | 95.66189        | 1000 | 131.35917       |
| 330 | 14.64963        | 670 | 97.09883        | -    | -               |
| 340 | 18.80630        | 680 | 98.50292        | -    | -               |

**Table S.4.** Calculated free-energy function,  $\Delta G$  ( $\Delta G = G_T - H_{298}$ ), of becquerelite. Temperature and free-energy values are given in  $K$  and  $J \cdot K^{-1} \cdot mol^{-1}$  units, respectively.

| T   | $G_T - H_{298}$ | T   | $G_T - H_{298}$ | T    | $G_T - H_{298}$ |
|-----|-----------------|-----|-----------------|------|-----------------|
| 10  | -2630.04781     | 350 | -174.19387      | 690  | -217.44347      |
| 20  | -1315.92018     | 360 | -174.88921      | 700  | -218.89021      |
| 30  | -878.98603      | 370 | -175.66746      | 710  | -220.33526      |
| 40  | -661.67477      | 380 | -176.52007      | 720  | -221.77826      |
| 50  | -532.39358      | 390 | -177.43946      | 730  | -223.21884      |
| 60  | -447.23395      | 400 | -178.41881      | 740  | -224.65677      |
| 70  | -387.34810      | 410 | -179.45207      | 750  | -226.09174      |
| 80  | -343.29153      | 420 | -180.53377      | 760  | -227.52354      |
| 90  | -309.80434      | 430 | -181.65911      | 770  | -228.95188      |
| 100 | -283.72214      | 440 | -182.82348      | 780  | -230.37653      |
| 110 | -263.02504      | 450 | -184.02312      | 790  | -231.79733      |
| 120 | -246.36339      | 460 | -185.25424      | 800  | -233.21416      |
| 130 | -232.79946      | 470 | -186.51371      | 810  | -234.62674      |
| 140 | -221.66341      | 480 | -187.79860      | 820  | -236.03501      |
| 150 | -212.46190      | 490 | -189.10612      | 830  | -237.43884      |
| 160 | -204.82491      | 500 | -190.43394      | 840  | -238.83807      |
| 170 | -198.46949      | 510 | -191.77977      | 850  | -240.23256      |
| 180 | -193.17513      | 520 | -193.14171      | 860  | -241.62224      |
| 190 | -188.76773      | 530 | -194.51772      | 870  | -243.00706      |
| 200 | -185.10821      | 540 | -195.90635      | 880  | -244.38690      |
| 210 | -182.08380      | 550 | -197.30588      | 890  | -245.76171      |
| 220 | -179.60241      | 560 | -198.71502      | 900  | -247.13138      |
| 230 | -177.58850      | 570 | -200.13240      | 910  | -248.49587      |
| 240 | -175.97860      | 580 | -201.55699      | 920  | -249.85516      |
| 250 | -174.71990      | 590 | -202.98752      | 930  | -251.20917      |
| 260 | -173.76784      | 600 | -204.42317      | 940  | -252.55790      |
| 270 | -173.08448      | 610 | -205.86289      | 950  | -253.90125      |
| 280 | -172.63716      | 620 | -207.30603      | 960  | -255.23923      |
| 290 | -172.39842      | 630 | -208.75166      | 970  | -256.57184      |
| 300 | -172.34390      | 640 | -210.19910      | 980  | -257.89903      |
| 310 | -172.45307      | 650 | -211.64778      | 990  | -259.22077      |
| 320 | -172.70755      | 660 | -213.09708      | 1000 | -260.53710      |
| 330 | -173.09145      | 670 | -214.54644      | -    | -               |
| 340 | -173.59100      | 680 | -215.99539      | -    | -               |
